# Supplementary material for: Bacterially-Associated Transcriptional Remodelling in a Distinct Genomic Subtype of Colorectal Cancer Provides a Plausible Molecular Basis for Disease Development
Source: PubMed Central journal article supplement (PMC5112903; doi:10.1371/journal.pone.0166282), 2016-11-15
Supplement: pone.0166282.s001.pdf [file pone.0166282.s001.pdf]

Supplemental Table 1a: Participant-level characteristics. FF = fresh-frozen; Tissue type: T=tumour tissue; Ethnicity: MA=mixed ancestry, C = caucasian, B = black, I=indian; Gender: M=male, F=female; RT=radiotherapy; N=No RT received before surgery; Stage: Dukes stage of tumour tissue.

| Sample | Specimen | Tumour   | Tissue | Patient | Age | Ethnicity | RT | Gender | BMI  | Stage | Location | Site                |
|--------|----------|----------|--------|---------|-----|-----------|----|--------|------|-------|----------|---------------------|
| 10T    | FF       | Sporadic | T      | 10      | 63  | MA        | N  | M      | 24.7 | III   | Distal   | Descending colon    |
| 11T    | FF       | Sporadic | T      | 11      | 84  | C         | N  | M      | 28.7 | I     | Proximal | Transverse colon    |
| 13T    | FF       | HNPCC    | T      | 13      | 46  | MA        | N  | F      | 22.3 | II    | Proximal | Caecum              |
| 14T    | FF       | Sporadic | T      | 14      | 80  | MA        | N  | M      | 23.5 | IV    | Distal   | Sigmoid colon       |
| 15T    | FF       | Sporadic | T      | 15      | 74  | I         | N  | M      | 24.2 | II    | Distal   | Rectum              |
| 18T    | FF       | HNPCC    | T      | 18      | 44  | MA        | N  | F      | NA   | I     | Proximal | Transverse colon    |
| 20T    | FF       | HNPCC    | T      | 20      | NA  | MA        | N  | F      | NA   | NA    | Proximal | Caecum              |
| 23T    | FF       | Sporadic | T      | 23      | 70  | MA        | N  | F      | NA   | III   | Distal   | Splenic flexure     |
| 33T    | FF       | Sporadic | T      | 33      | 69  | MA        | N  | F      | 28.7 | III   | Distal   | Rectum              |
| 34T    | FF       | Sporadic | T      | 34      | 70  | MA        | N  | F      | 25.4 | III   | Distal   | Rectum              |
| 37T    | FF       | Sporadic | T      | 37      | 49  | B         | N  | M      | 20   | III   | Distal   | Proximal descending |
| 3T     | FF       | Sporadic | T      | 3       | 70  | MA        | N  | M      | 29.5 | III   | Distal   | RSJ                 |
| 41T    | FF       | Sporadic | T      | 41      | 71  | MA        | N  | F      | 31.6 | II    | Distal   | Rectum              |
| 44T    | FF       | Sporadic | T      | 44      | 36  | B         | N  | M      | 18.2 | III   | Proximal | Caecum              |
| 48T    | FF       | Sporadic | T      | 48      | 37  | MA        | N  | M      | 30.7 | IV    | Distal   | NA                  |
| 4T     | FF       | HNPCC    | T      | 4       | 44  | MA        | N  | F      | 26.7 | III   | Proximal | Caecum              |
| 55T    | FF       | Sporadic | T      | 55      | 64  | MA        | N  | M      | 25.8 | III   | Distal   | NA                  |
| 56T    | FF       | Sporadic | T      | 56      | 54  | MA        | N  | F      | 26.9 | III   | Distal   | RSJ                 |
| 60T    | FF       | Sporadic | T      | 60      | 65  | MA        | N  | M      | NA   | II    | Distal   | RSJ                 |
| 63T    | FF       | Sporadic | T      | 63      | 78  | C         | N  | F      | 26.8 | II    | Proximal | Hepatic flexure     |

Supplemental Table 1b. Bacterial copy numbers detected (per 50ng of DNA extracted from tissue). ETBF: Enterotoxigenic *B. fragilis*; EPEC=Enteropathogenic *E. coli*; EF=*E. faecalis*; FB=Fusobacterium; afaC=afaC gene from AIEC; CIB=Colibactin gene from AIEC.

| Sample | ETBF  | EPEC | EF  | FB    | afaC  | CIB  |
|--------|-------|------|-----|-------|-------|------|
| 10N    | 12    | 0    | NA  | 8     | 2177  | 0    |
| 10T    | 139   | 0    | 0   | 1     | 170   | 0    |
| 11N    | 0     | 0    | 0   | 0     | 0     | 0    |
| 11T    | 0     | 0    | 0   | 0     | 0     | 0    |
| 13N    | 374   | 0    | 0   | 65    | 3787  | 0    |
| 13T    | 3186  | 0    | 1   | 3273  | 19200 | 0    |
| 14N    | 3423  | 0    | 331 | 67    | 261   | 0    |
| 14T    | 987   | 0    | 151 | 271   | 729   | 0    |
| 15N    | 2     | 0    | 0   | 9     | 4787  | 1172 |
| 15T    | 0     | 0    | 0   | 17    | 9887  | 1707 |
| 18N    | 0     | 0    | 5   | 377   | 1937  | 0    |
| 18T    | 0     | 0    | 3   | 2610  | 7593  | 994  |
| 20N    | 3     | 0    | NA  | 0     | 0     | 0    |
| 20T    | 13    | 0    | NA  | 2     | 0     | 0    |
| 23N    | 5     | 0    | 1   | 26    | 0     | 0    |
| 23T    | 3     | 0    | 250 | 4820  | 0     | 0    |
| 33N    | 0     | 0    | 0   | 3     | 0     | 677  |
| 33T    | 0     | 0    | 0   | 14    | 0     | 622  |
| 34N    | 0     | 52   | 0   | 25    | 30900 | 1263 |
| 34T    | 3     | 63   | 1   | 289   | 33433 | 1400 |
| 37N    | 1620  | 0    | NA  | 1897  | 0     | 3693 |
| 37T    | 35300 | 0    | 0   | 4773  | 0     | 1800 |
| 3N     | 0     | 0    | 0   | 1     | 0     | 0    |
| 3T     | 0     | 0    | 0   | 3     | 0     | 0    |
| 41N    | 0     | 0    | NA  | 69    | 0     | 0    |
| 41T    | 0     | 0    | NA  | 213   | 2     | 0    |
| 44N    | 0     | 3037 | 0   | 1110  | 1197  | 36   |
| 44T    | 0     | 1111 | 0   | 68700 | 156   | 0    |
| 48N    | 2328  | 0    | 0   | 1     | 0     | 0    |
| 48T    | 1106  | 0    | 0   | 44    | 0     | 0    |
| 4N     | 0     | 0    | 0   | 20    | 195   | 0    |
| 4T     | 3     | 0    | 0   | 60767 | 6537  | 0    |
| 55N    | 4     | 0    | 0   | 99    | 0     | 5777 |
| 55T    | 3     | 0    | 0   | 9     | 0     | 536  |
| 56N    | 698   | 0    | 0   | 46    | 0     | 0    |
| 56T    | 648   | 0    | 0   | 378   | 0     | 0    |
| 60N    | 20    | 0    | 0   | 3     | 2750  | 78   |
| 60T    | 0     | 0    | 0   | 22    | 5237  | 69   |
| 63N    | 0     | 0    | NA  | 73    | 0     | 0    |
| 63T    | 0     | 13   | 4   | 2730  | 0     | 0    |

Supplemental Table 2. Summary of differential gene expression analyses conducted for **tumour** samples showing the number of transcript clusters differentially expressed for each comparison made.

| Model specified     | Number of samples/category | FDR $\leq$ 0.05, FC $\geq$ 2 |
|---------------------|----------------------------|------------------------------|
| EF+ vs. EF-         | 7 vs. 10                   | 128                          |
| FB-H vs. FB-L/N     | 7 vs. 12                   | 3                            |
| afaC-H vs. afaC-L/N | 5 vs. 14                   | 0                            |
| afaC+ vs. afaC-     | 13 vs. 8                   | 0                            |
| CIB+ vs. CIB-       | 6 vs. 13                   | 0                            |
| ETBF-H vs. ETBF L/N | 3 vs. 16                   | 0                            |
| ETBF+ vs. ETBF-     | 10 vs. 9                   | 0                            |
| EPEC+ vs. EPEC-     | 3 vs. 16                   | 0                            |

H: high-level infection; L: low-level infection; N: no infection; FB: Fusobacterium; EF: *E. faecalis*

Supplemental Table 3: Summary of differential gene expression analyses conducted for **normal** samples showing the number of transcript clusters differentially expressed for each comparison made.

| Model specified     | Number of samples/category | FDR $\leq$ 0.05 & FC $\geq$ 2 |
|---------------------|----------------------------|-------------------------------|
| ETBF+ vs. ETBF-     | 10 vs. 9                   | 0                             |
| ETBF-H vs. ETBF-L/N | 4 vs. 20                   | 0                             |
| CIB+ vs. CIB-       | 6 vs. 13                   | 0                             |
| afaC+ vs. afaC-     | 10 vs. 9                   | 0                             |
| afaC-H vs. afaC-L/N | 3 vs. 16                   | 0                             |
| EF+ vs. EF-         | 4 vs. 10                   | 0                             |
| FB-H vs. FB-L/N     | 3 vs. 16                   | 0                             |
| FB+ vs. FB-         | 16 vs. 3                   | 0                             |

H: high-level infection; L: low-level infection; N: no infection; FB: Fusobacterium; EF: *E. faecalis*

Supplemental Table 4: Descriptive characteristics by CRC subtype.

|                       | Group A (N = 9) | Group B (N = 10) | P (Fisher's exact) |
|-----------------------|-----------------|------------------|--------------------|
| <b>MSI-H</b>          | 3               | 4                | 1.00               |
| <b>HNPCC+</b>         | 2               | 2                | 1.00               |
| <b>Stage*</b>         |                 |                  |                    |
| <i>I/II</i>           | 2               | 5                | 0.37               |
| <i>III/IV</i>         | 6               | 5                | 0.37               |
| <b>Site</b>           |                 |                  |                    |
| <i>Proximal colon</i> | 2               | 5                | 0.35               |
| <i>Distal colon</i>   | 5               | 2                | 0.35               |
| <i>Rectum</i>         | 2               | 3                | 1.00               |
| <b>Age*</b>           |                 |                  |                    |
| <i>≤ 60</i>           | 2               | 4                | 0.63               |
| <i>&gt; 60</i>        | 6               | 6                | 1                  |
| <b>Gender</b>         |                 |                  |                    |
| <i>Male</i>           | 5               | 4                | 0.66               |
| <i>Female</i>         | 4               | 6                | 0.66               |
| <b>Ethnicity</b>      |                 |                  |                    |
| <i>Mixed ancestry</i> | 8               | 5                | 0.14               |
| <i>Black</i>          | 0               | 2                | 0.47               |
| <i>White</i>          | 0               | 3                | 0.2                |
| <i>Indian</i>         | 1               | 0                | 0.47               |

\*One case had missing information

Supplemental Table 5a: Top 20 most significant IPA canonical pathways in group B vs. group A samples of our cohort.

| Ingenuity Canonical Pathways                                 | $-\log(p)$ | Downregulat | Upregulated   |
|--------------------------------------------------------------|------------|-------------|---------------|
| EIF2 Signaling                                               | 13.4       | 8/169 (5%)  | 109/169 (64%) |
| Role of BRCA1 in DNA Damage Response                         | 10.6       | 0/60 (0%)   | 46/60 (77%)   |
| Protein Ubiquitination Pathway                               | 9.27       | 20/249 (8%) | 126/249 (51%) |
| Cell Cycle Control of Chromosomal Replication                | 9.25       | 1/27 (4%)   | 25/27 (93%)   |
| Cell Cycle: G2/M DNA Damage Checkpoint Regulation            | 8.48       | 1/48 (2%)   | 32/48 (67%)   |
| Mitotic Roles of Polo-Like Kinase                            | 8.32       | 4/63 (6%)   | 39/63 (62%)   |
| Hereditary Breast Cancer Signaling                           | 7.29       | 7/111 (6%)  | 61/111 (55%)  |
| Role of CHK Proteins in Cell Cycle Checkpoint Control        | 6.52       | 4/55 (7%)   | 36/55 (65%)   |
| tRNA Charging                                                | 5.72       | 0/38 (0%)   | 26/38 (68%)   |
| RAN Signaling                                                | 5.61       | 0/16 (0%)   | 15/16 (94%)   |
| Mismatch Repair in Eukaryotes                                | 5.61       | 0/16 (0%)   | 13/16 (81%)   |
| Cell Cycle: G1/S Checkpoint Regulation                       | 4.86       | 7/63 (11%)  | 32/63 (51%)   |
| Regulation of eIF4 and p70S6K Signaling                      | 4.54       | 10/141 (7%) | 72/141 (51%)  |
| Cyclins and Cell Cycle Regulation                            | 4.46       | 10/77 (13%) | 36/77 (47%)   |
| ATM Signaling                                                | 4.09       | 2/59 (3%)   | 31/59 (53%)   |
| Telomere Extension by Telomerase                             | 4.09       | 0/15 (0%)   | 14/15 (93%)   |
| Purine Nucleotides De Novo Biosynthesis II                   | 4.03       | 1/11 (9%)   | 8/11 (73%)    |
| DNA Double-Strand Break Repair by Homologous Recombination   | 3.60       | 0/14 (0%)   | 10/14 (71%)   |
| DNA Double-Strand Break Repair by Non-Homologous End Joining | 3.60       | 0/14 (0%)   | 11/14 (79%)   |
| DNA damage-induced 14-3-3 $\epsilon$ Signaling               | 3.47       | 3/19 (16%)  | 11/19 (58%)   |
| Estrogen-mediated S-phase Entry                              | 3.45       | 3/24 (13%)  | 16/24 (67%)   |

Supplemental Table 5b: Top 20 most significant IPA canonical pathways in group B vs. group A samples of the Jorissen cohort.

| Ingenuity Canonical Pathways                      | -log(p-value) | Downregulated | Upregulated   |
|---------------------------------------------------|---------------|---------------|---------------|
| Antigen Presentation Pathway                      | 9.28          | 1/34 (3%)     | 28/34 (82%)   |
| IGF-1 Signaling                                   | 8.40          | 14/96 (15%)   | 46/96 (48%)   |
| Glucocorticoid Receptor Signaling                 | 8.38          | 24/256 (9%)   | 106/256 (41%) |
| Role of NFAT in Regulation of the Immune Response | 8.31          | 14/158 (9%)   | 74/158 (47%)  |
| CD28 Signaling in T Helper Cells                  | 7.83          | 9/107 (8%)    | 55/107 (51%)  |
| OX40 Signaling Pathway                            | 7.71          | 2/46 (4%)     | 32/46 (70%)   |
| Role of Tissue Factor in Cancer                   | 7.35          | 11/107 (10%)  | 52/107 (49%)  |
| Cdc42 Signaling                                   | 7.21          | 8/121 (7%)    | 61/121 (50%)  |
| B Cell Receptor Signaling                         | 7.17          | 16/167 (10%)  | 73/167 (44%)  |
| Leukocyte Extravasation Signaling                 | 6.76          | 13/191 (7%)   | 85/191 (45%)  |
| Integrin Signaling                                | 6.68          | 18/194 (9%)   | 81/194 (42%)  |
| Protein Ubiquitination Pathway                    | 6.54          | 21/251 (8%)   | 101/251 (40%) |
| Virus Entry via Endocytic Pathways                | 6.51          | 10/89 (11%)   | 43/89 (48%)   |
| Caveolar-mediated Endocytosis Signaling           | 6.19          | 6/71 (8%)     | 38/71 (54%)   |
| HGF Signaling                                     | 6.16          | 12/104 (12%)  | 47/104 (45%)  |
| PI3K/AKT Signaling                                | 6.14          | 13/120 (11%)  | 53/120 (44%)  |
| IL-17 Signaling                                   | 5.94          | 4/72 (6%)     | 40/72 (56%)   |
| Type I Diabetes Mellitus Signaling                | 5.63          | 3/100 (3%)    | 53/100 (53%)  |
| Prostate Cancer Signaling                         | 5.61          | 7/80 (9%)     | 40/80 (50%)   |
| PKC $\epsilon$ Signaling in T Lymphocytes         | 5.60          | 7/107 (7%)    | 52/107 (49%)  |

Supplemental Table 6a: Top 20 most significant upstream regulators predicted to be significantly altered in group B vs. group A samples in **our cohort**, with absolute activation z-scores  $\geq 2$ . Chemical upstream regulators were excluded

| Upstream Regulator                      | Molecule Type              | Activation | p-value of |
|-----------------------------------------|----------------------------|------------|------------|
| CDKN1A                                  | Other                      | -3.688     | 3.68E-17   |
| E2F1                                    | transcription regulator    | 5          | 1.91E-15   |
| MYC                                     | transcription regulator    | 7.745      | 1.84E-14   |
| XBP1                                    | transcription regulator    | 7.864      | 5.63E-14   |
| let-7                                   | microRNA                   | -7.67      | 2.62E-13   |
| MYCN                                    | transcription regulator    | 5.696      | 1.88E-12   |
| RB1                                     | transcription regulator    | -4.904     | 1.91E-12   |
| CDKN2A                                  | transcription regulator    | -5.151     | 3.04E-12   |
| NFE2L2                                  | transcription regulator    | 6.705      | 3.33E-10   |
| E2f                                     | Group                      | 3.208      | 8.82E-10   |
| TBX2                                    | transcription regulator    | 5.857      | 2.86E-09   |
| PTGER2                                  | G-protein coupled receptor | 5.092      | 4.28E-09   |
| EP400                                   | Other                      | 4.029      | 7.37E-09   |
| CCND1                                   | transcription regulator    | 4.56       | 8.15E-09   |
| NUPR1                                   | transcription regulator    | -9.207     | 3.79E-08   |
| miR-1 (and other miRNAs w/seed GGAAUGU) | mature microRNA            | -7.472     | 1.92E-07   |
| E2F2                                    | transcription regulator    | 2.5        | 2.75E-07   |
| RICTOR                                  | Other                      | -7.97      | 4.30E-07   |
| Rb                                      | Group                      | -4.619     | 5.80E-07   |
| KDM5B                                   | transcription regulator    | -5.879     | 3.53E-06   |

Supplemental Table 6b: Top 20 most significant upstream regulators predicted to be significantly altered in group B vs. group A samples in the **Jorissen cohort**, with absolute activation z-scores  $\geq 2$ . Chemical upstream regulators were excluded.

| Upstream Regulator | Molecule Type           | Activation z-score | p-value of overlap |
|--------------------|-------------------------|--------------------|--------------------|
| TGFB1              | growth factor           | 7.62               | 4.62E-43           |
| IFNG               | cytokine                | 11.73              | 9.13E-42           |
| TP53               | transcription regulator | 4.115              | 1.14E-41           |
| TNF                | cytokine                | 11.051             | 7.45E-33           |
| IL2                | cytokine                | 6.836              | 3.86E-26           |
| STAT3              | transcription regulator | 6.512              | 1.81E-23           |
| IFNA2              | cytokine                | 8.837              | 7.99E-23           |
| OSM                | cytokine                | 7.171              | 1.63E-22           |
| CD40LG             | cytokine                | 7.058              | 9.83E-22           |
| IL4                | cytokine                | 5.298              | 4.38E-21           |
| CD3                | complex                 | -4.992             | 5.04E-21           |
| IL1B               | cytokine                | 10.491             | 1.23E-20           |
| HRAS               | enzyme                  | 2.703              | 1.50E-20           |
| IL6                | cytokine                | 8.821              | 8.31E-20           |
| HGF                | growth factor           | 5.829              | 1.13E-19           |
| APP                | other                   | 4.657              | 1.50E-19           |
| Interferon alpha   | group                   | 8.861              | 1.51E-19           |
| NFKBIA             | transcription regulator | 4.071              | 2.99E-19           |
| Vegf               | group                   | 7.696              | 2.77E-18           |
| CSF2               | cytokine                | 8                  | 3.87E-18           |

Supplemental Table 6c: Upstream regulators predicted to be significantly altered in **our cohort and the Jorissen cohort** in group B vs. group A samples, with absolute activation z-scores  $\geq 2$ . Chemical upstream regulators are not shown.

| Upstream Regulator   | Molecule Type              | Activation | p-value of | Activation | p-value of |
|----------------------|----------------------------|------------|------------|------------|------------|
| BAX                  | Transporter                | 3.223      | 0.0103     | 3.471      | 9.67E-06   |
| CD28                 | transmembrane receptor     | -6.198     | 0.0313     | -3.741     | 4.54E-13   |
| KDM5B                | transcription regulator    | -5.879     | 3.53E-06   | -4.241     | 3.05E-07   |
| TSC22D1              | transcription regulator    | 2.236      | 0.00386    | 2.449      | 0.00112    |
| E2F2                 | transcription regulator    | 2.5        | 2.75E-07   | 2.63       | 0.00495    |
| SREBF1               | transcription regulator    | 3.145      | 0.00983    | 2.371      | 0.00225    |
| ATF4                 | transcription regulator    | 4.22       | 0.000396   | 3.736      | 0.000108   |
| FOXM1                | transcription regulator    | 4.498      | 1.65E-05   | 3.503      | 0.000101   |
| E2F1                 | transcription regulator    | 5          | 1.91E-15   | 3.969      | 3.23E-08   |
| NFE2L2               | transcription regulator    | 6.705      | 3.33E-10   | 4.295      | 5.58E-07   |
| XBP1                 | transcription regulator    | 7.864      | 5.63E-14   | 7.336      | 1.58E-10   |
| Irgm1                | Other                      | -4.101     | 0.00292    | -4.208     | 5.15E-06   |
| BID                  | Other                      | 2.121      | 0.0136     | 3.302      | 0.000496   |
| APP                  | Other                      | 2.403      | 0.00363    | 4.657      | 1.50E-19   |
| PRNP                 | Other                      | 2.714      | 0.034      | 2.283      | 2.34E-05   |
| RAB1B                | Other                      | 2.864      | 0.00401    | 2.469      | 0.00657    |
| SCAP                 | Other                      | 3.59       | 0.00525    | 2.652      | 0.0429     |
| GAST                 | Other                      | 4.8        | 0.0156     | 3.616      | 0.00011    |
| CD24                 | Other                      | 5.385      | 0.0145     | 2.853      | 4.10E-10   |
| let-7                | microRNA                   | -7.67      | 2.62E-13   | -2.755     | 5.97E-07   |
| miR-124-3p (and      | mature microRNA            | -8.019     | 3.20E-05   | -7.563     | 3.17E-12   |
| miR-1 (and other     | mature microRNA            | -7.472     | 1.92E-07   | -6.004     | 3.74E-12   |
| miR-16-5p (and       | mature microRNA            | -7.363     | 8.80E-06   | -4.226     | 1.12E-08   |
| miR-155-5p           | mature microRNA            | -5.855     | 0.00501    | -5.971     | 4.12E-15   |
| miR-30c-5p (and      | mature microRNA            | -5.81      | 0.00016    | -4.682     | 4.68E-09   |
| let-7a-5p (and other | mature microRNA            | -5.531     | 0.0158     | -2.946     | 0.00713    |
| miR-291a-3p (and     | mature microRNA            | -4.991     | 0.0457     | -2.811     | 0.000176   |
| miR-145-5p (and      | mature microRNA            | -3.312     | 0.0471     | -4.289     | 8.14E-05   |
| miR-34a-5p (and      | mature microRNA            | -2.707     | 0.0207     | -2.88      | 2.14E-06   |
| PIM1                 | Kinase                     | 2.113      | 0.0221     | 2.175      | 0.0018     |
| ATM                  | Kinase                     | 2.685      | 0.000793   | 2.635      | 1.93E-06   |
| ANGPT2               | growth factor              | 5.468      | 0.000382   | 5.213      | 2.70E-10   |
| HGF                  | growth factor              | 7.825      | 0.00285    | 5.829      | 1.13E-19   |
| caspase              | Group                      | 2.538      | 0.016      | 2.55       | 0.0373     |
| Jnk                  | Group                      | 3.323      | 0.0293     | 5.8        | 8.19E-12   |
| PTGER2               | G-protein coupled receptor | 5.092      | 4.28E-09   | 2.702      | 0.0102     |
| CAT                  | Enzyme                     | -2.745     | 0.025      | -3.046     | 7.31E-12   |
| PLA2G2A              | Enzyme                     | 2.228      | 0.0108     | 2.559      | 0.00036    |
| PIN1                 | Enzyme                     | 2.534      | 0.0128     | 2.107      | 0.00232    |
| CD38                 | Enzyme                     | 4.713      | 0.0189     | 5.897      | 5.13E-07   |
| IL3                  | Cytokine                   | 3.316      | 0.0132     | 4.617      | 4.88E-08   |
| IL5                  | Cytokine                   | 5.279      | 0.0306     | 7.804      | 1.99E-14   |
| CSF2                 | Cytokine                   | 8.068      | 0.000137   | 8          | 3.87E-18   |
| CD3                  | Complex                    | -7.035     | 0.00874    | -4.992     | 5.04E-21   |

Supplemental Table 7a: Top 20 most significantly different IPA diseases and functions group B vs. group A samples in our cohort. A p-value of overlap of 0.05 and lz-score cutoff of 2 was used.

| Categories                                                      | Diseases or Functions                   | p-Value  | Activation |
|-----------------------------------------------------------------|-----------------------------------------|----------|------------|
| Cell Cycle, DNA Replication, Recombination, and Repair          | checkpoint control                      | 7.43E-16 | 3.38       |
| DNA Replication, Recombination, and Repair                      | DNA replication                         | 5.96E-14 | 2.439      |
| DNA Replication, Recombination, and Repair                      | repair of DNA                           | 1.05E-11 | 3.485      |
| Cell Cycle                                                      | cell cycle progression                  | 5.97E-11 | 3.578      |
| Infectious Disease                                              | infection of cells                      | 7.81E-09 | 9.811      |
| Gene Expression, Protein Synthesis                              | translation of RNA                      | 1.02E-08 | -3.348     |
| Cell Cycle                                                      | M phase                                 | 1.28E-08 | 3.17       |
| Gene Expression, Protein Synthesis                              | translation of mRNA                     | 1.93E-08 | -3.348     |
| Cellular Compromise, DNA Replication, Recombination, and Repair | damage of chromosomes                   | 2.05E-08 | -3.861     |
| DNA Replication, Recombination, and Repair                      | metabolism of DNA                       | 6.24E-08 | 3.059      |
| Cellular Compromise, DNA Replication, Recombination, and Repair | breakage of chromosomes                 | 1.74E-07 | -3.422     |
| Cell Cycle                                                      | interphase                              | 2.32E-07 | 3.233      |
| Cell Cycle                                                      | cycling of centrosome                   | 5.55E-07 | 2.759      |
| Infectious Disease                                              | infection by RNA virus                  | 5.75E-07 | 10.075     |
| Infectious Disease                                              | infection by HIV-1                      | 5.77E-07 | 9.176      |
| Infectious Disease                                              | infection of tumour cell lines          | 6.62E-07 | 7.739      |
| Infectious Disease, Reproductive System Disease                 | infection of cervical cancer cell lines | 6.76E-07 | 7.737      |
| Cell Cycle, DNA Replication, Recombination, and Repair          | S phase checkpoint control              | 6.85E-07 | 2.23       |
| Cell Cycle, DNA Replication, Recombination, and Repair          | checkpoint control of tumour cell lines | 7.64E-07 | 2.059      |
| Cell Cycle                                                      | senescence of cells                     | 1.17E-06 | -3.239     |

Supplemental Table 7b: Top 20 most significantly different IPA diseases and functions group B vs. group A samples in the Jorissen cohort. A p-value of overlap of 0.05 and Iz-score cutoff of 2 was used.

| Categories                                                                                             | Diseases or Functions              | p-Value  | Predicted | Activation |
|--------------------------------------------------------------------------------------------------------|------------------------------------|----------|-----------|------------|
| Cellular Growth and Proliferation                                                                      | proliferation of cells             | 6.09E-46 | Increased | 6.123      |
| Cellular Movement                                                                                      | cell movement                      | 2.13E-35 | Increased | 7.194      |
| Cellular Movement                                                                                      | migration of cells                 | 1.42E-33 | Increased | 7.233      |
| Cellular Movement                                                                                      | invasion of cells                  | 3.58E-32 | Increased | 4.663      |
| Hematological System                                                                                   | quantity of leukocytes             | 1.71E-31 | Increased | 5.323      |
| Cell Death and Survival                                                                                | cell death of immune cells         | 8.35E-30 | Increased | 3.67       |
| Hematological System Development and Function, Tissue Morphology                                       | quantity of blood cells            | 1.50E-28 | Increased | 4.982      |
| Cell Death and Survival                                                                                | cell death of blood cells          | 1.52E-28 | Increased | 3.468      |
| Cancer                                                                                                 | advanced malignant tumour          | 2.44E-28 | Increased | 2.61       |
| Cancer                                                                                                 | growth of tumour                   | 6.45E-28 | Increased | 3.179      |
| Infectious Disease                                                                                     | Viral Infection                    | 9.93E-28 | Increased | 5.851      |
| Cancer                                                                                                 | metastasis                         | 3.59E-27 | Increased | 2.61       |
| Cellular Function and                                                                                  | function of blood cells            | 7.51E-26 | Increased | 2.927      |
| Cellular Development, Cellular Growth and Proliferation, Hematological System Development and Function | proliferation of immune cells      | 1.34E-25 | Increased | 2.709      |
| Cellular Function and Maintenance                                                                      | function of leukocytes             | 2.27E-25 | Increased | 2.715      |
| Cellular Development, Cellular Growth and Proliferation                                                | proliferation of tumour cell lines | 8.51E-25 | Increased | 3.402      |
| Cellular Movement                                                                                      | cell movement of tumour cell lines | 4.11E-24 | Increased | 4.435      |
| Cellular Movement                                                                                      | cell movement of blood cells       | 5.40E-24 | Increased | 8.081      |
| Cellular Development, Cellular Growth and Proliferation                                                | proliferation of blood cells       | 6.64E-24 | Increased | 2.627      |
| Cellular Movement                                                                                      | migration of blood cells           | 9.14E-24 | Increased | 8.181      |

Supplemental Table 7c: IPA diseases and functions categories shared between subgroups in our cohort (columns 3&4) and that of the Jorissen cohort (columns 5&6). A p-value of overlap of 0.05 and lz-scorel cutoff of 2 was used.

| Categories                               | Diseases or functions annotation    | p-value  | Activation z score | p-value (Jorissen) | Activation z score. (Jorissen) |
|------------------------------------------|-------------------------------------|----------|--------------------|--------------------|--------------------------------|
| Protein Synthesis                        | metabolism of protein               | 0.000524 | 2.722              | 4.07E-09           | 2.824                          |
| Molecular Transport, Protein Trafficking | transport of protein                | 0.0022   | 3.648              | 1.25E-11           | 2.364                          |
| Cell Death and Survival                  | cell viability of tumour cell lines | 0.000651 | 7.672              | 3.49E-14           | 4.475                          |
| Cell Death and Survival                  | cell survival                       | 0.00393  | 8.121              | 6.58E-22           | 7.171                          |
| Cellular Growth and Proliferation        | proliferation of cells              | 0.0019   | 8.856              | 6.09E-46           | 6.123                          |
| Infectious Disease                       | infection by lentivirus             | 3.47E-06 | 9.31               | 4.27E-08           | 7.254                          |
| Infectious Disease                       | HIV infection                       | 4.09E-06 | 9.419              | 6.95E-08           | 7.356                          |
| Infectious Disease                       | infection by Retroviridae           | 4.78E-06 | 9.423              | 5.37E-08           | 7.442                          |
| Infectious Disease                       | infection of cells                  | 7.81E-09 | 9.811              | 1.49E-11           | 7.583                          |
| Infectious Disease                       | infection by RNA virus              | 5.75E-07 | 10.075             | 2.01E-10           | 7.491                          |
| Infectious Disease                       | Viral Infection                     | 9.10E-05 | 10.224             | 9.93E-28           | 5.851                          |

Supplemental Table 8. PARADIGM-derived abstract processes significantly altered (FDR  $\leq$  0.05, absolute median difference between subgroups  $\geq$  0.25) between RPMM-subgroups in our cohort as well as the Jorissen cohort.

| Integrated pathway level (IPL)                            | FDR      | Subgroup diff. | FDR (Jorissen) | Subgroup diff. (Jorissen) |
|-----------------------------------------------------------|----------|----------------|----------------|---------------------------|
| negative_regulation_of_DNA_binding_(abstract)             | 6.31E-03 | 2.7            | 7.76E-16       | 2.6                       |
| anoikis_(abstract)                                        | 3.66E-02 | 2.2            | 3.68E-16       | 3.3                       |
| protein_catabolic_process_(abstract)                      | 8.22E-04 | 1.9            | 3.81E-15       | 1.2                       |
| G2/M_transition_DNA_damage_checkpoint_(abstract)          | 2.26E-02 | 1.9            | 7.77E-15       | 1.6                       |
| response_to_radiation_(abstract)                          | 4.74E-02 | 1.7            | 8.62E-17       | 2.3                       |
| DNA_damage_checkpoint_(abstract)                          | 1.27E-03 | 1.6            | 1.99E-04       | 0.9                       |
| regulation_of_transcription_(abstract)                    | 1.21E-03 | 1.6            | 7.59E-04       | 0.6                       |
| prostaglandin_biosynthetic_process_(abstract)             | 2.36E-02 | 1.3            | 3.58E-07       | 0.7                       |
| spindle_assembly_(abstract)                               | 1.99E-02 | 1.2            | 1.37E-02       | 0.6                       |
| regulation_of_mitotic_centrosome_separation_(abstract)    | 3.72E-03 | 1.2            | 3.22E-02       | 0.3                       |
| protein_folding_(abstract)                                | 2.24E-03 | 1.2            | 7.27E-04       | 0.9                       |
| G1/S_transition_checkpoint_(abstract)                     | 8.83E-03 | 1.0            | 1.59E-03       | 0.4                       |
| Golgi_organization_(abstract)                             | 8.32E-03 | 1.0            | 4.35E-02       | 0.6                       |
| activation_of_caspase_activity_by_cytochrome_c_(abstract) | 2.64E-02 | 0.8            | 3.34E-16       | 1.0                       |
| cell_cycle_arrest_(abstract)                              | 3.09E-02 | -1.2           | 2.08E-06       | -0.5                      |
| ribosome_biogenesis_(abstract)                            | 3.24E-02 | -2.9           | 8.79E-13       | -2.7                      |

Subgroup diff.: median difference in PARADIGM activity score between each subgroup. The first two columns represent the FDR and difference in medians for our cohort

Supplemental Table 9: comparison of canonical pathways with particular biological interest in B group vs. A group CRCs compared to MSI vs. MSS status in the same cohort.

| Ingenuity Canonical Pathways                                                 | -log(p-value) (MSI vs. MSS) | Down-regulated (MSI vs. MSS) | Up-regulated (MSI vs. MSS) | -log(p-value) (group B vs. A) | Down-regulated (group B vs. A) | Up-regulated (group B vs. A) |
|------------------------------------------------------------------------------|-----------------------------|------------------------------|----------------------------|-------------------------------|--------------------------------|------------------------------|
| Antigen Presentation Pathway                                                 | 6.28                        | 1/34 (3%)                    | 22/34 (65%)                | 9.28                          | 1/34 (3%)                      | 28/34 (82%)                  |
| Colorectal Cancer Metastasis Signaling                                       | 4.65                        | 46/230 (20%)                 | 67/230 (29%)               | 5.27                          | 20/230 (9%)                    | 89/230 (39%)                 |
| Production of Nitric Oxide and Reactive Oxygen Species in Macrophages        | 3.61                        | 36/179 (20%)                 | 64/179 (36%)               | 3.52                          | 18/179 (10%)                   | 64/179 (36%)                 |
| VEGF Signaling                                                               | 2.73                        | 19/89 (21%)                  | 25/89 (28%)                | 3.61                          | 10/89 (11%)                    | 36/89 (40%)                  |
| Role of Pattern Recognition Receptors in Recognition of Bacteria and Viruses | 2.53                        | 17/118 (14%)                 | 42/118 (36%)               | 2.51                          | 8/118 (7%)                     | 46/118 (39%)                 |
| IL-17 Signaling                                                              | 2.47                        | 12/72 (17%)                  | 29/72 (40%)                | 5.94                          | 4/72 (6%)                      | 40/72 (56%)                  |
| IL-8 Signaling                                                               | 2.19                        | 32/183 (17%)                 | 55/183 (30%)               | 4.14                          | 15/183 (8%)                    | 71/183 (39%)                 |
| Protein Ubiquitination Pathway                                               | 1.32                        | 40/251 (16%)                 | 90/251 (36%)               | 6.54                          | 21/251 (8%)                    | 101/251 (40%)                |
| Role of BRCA1 in DNA Damage Response                                         | 1.13                        | 12/61 (20%)                  | 16/61 (26%)                | 1.85                          | 12/61 (20%)                    | 17/61 (28%)                  |
| Cell Cycle: G2/M DNA Damage Checkpoint Regulation                            | 7.53E-01                    | 13/49 (27%)                  | 13/49 (27%)                | 1.79                          | 7/49 (14%)                     | 17/49 (35%)                  |
| ATM Signaling                                                                | 4.80E-01                    | 9/59 (15%)                   | 18/59 (31%)                | 2.77                          | 6/59 (10%)                     | 25/59 (42%)                  |

Supplemental Table 10: Comparison of HLA genes significantly differentially expressed in a) MSI vs. MSS cancers and b) group B vs. group A CRCs of the Jorissen cohort.

| Probeset ID | Gene symbol | FDR (MSI vs. MSS) | FC (MSI vs. MSS) | FDR (group B vs. group A) | FC (group B vs. group A) | Relative subtype-specific effect |
|-------------|-------------|-------------------|------------------|---------------------------|--------------------------|----------------------------------|
| 201137_s_at | HLA-DPB1    | 3.0E-06           | 2.4              | 4.0E-14                   | 3.6                      | increased                        |
| 203932_at   | HLA-DMB     | 3.3E-09           | 2.3              | 3.1E-10                   | 2.4                      | increased                        |
| 205671_s_at | HLA-DOB     | 3.7E-05           | 1.6              | 1.4E-02                   | 1.3                      | decreased                        |
| 208894_at   | HLA-DRA     | 4.0E-06           | 3.1              | 9.9E-13                   | 5.2                      | increased                        |
| 209480_at   | HLA-DQB1    | 9.9E-03           | 1.8              | 6.4E-03                   | 1.8                      | decreased                        |
| 209823_x_at | HLA-DQB1    | 2.3E-06           | 2.3              | 1.2E-12                   | 3.3                      | increased                        |
| 210982_s_at | HLA-DRA     | 2.0E-06           | 3.0              | 5.8E-13                   | 4.7                      | increased                        |
| 211654_x_at | HLA-DQB1    | 2.1E-05           | 2.1              | 5.5E-07                   | 2.3                      | increased                        |
| 211656_x_at | HLA-DQB1    | 1.1E-05           | 1.9              | 1.8E-10                   | 2.4                      | increased                        |
| 211990_at   | HLA-DPA1    | 1.7E-06           | 2.8              | 4.0E-10                   | 3.6                      | increased                        |
| 211991_s_at | HLA-DPA1    | 5.7E-07           | 3.1              | 2.9E-12                   | 4.4                      | increased                        |
| 212998_x_at | HLA-DQB1    | 1.2E-05           | 2.7              | 1.4E-08                   | 3.4                      | increased                        |
| 212999_x_at | HLA-DQB1    | 1.5E-03           | 1.7              | 4.2E-04                   | 1.7                      | increased                        |
| 213537_at   | HLA-DPA1    | 4.0E-06           | 2.6              | 1.9E-07                   | 2.8                      | increased                        |
| 213831_at   | HLA-DQA1    | 8.2E-03           | 2.1              | 1.3E-05                   | 3.0                      | increased                        |
| 217362_x_at | HLA-DRB6    | 5.2E-07           | 1.7              | 4.0E-10                   | 1.9                      | increased                        |
| 217478_s_at | HLA-DMA     | 7.8E-08           | 3.0              | 4.4E-10                   | 3.4                      | increased                        |
| 226878_at   | HLA-DOA     | 1.5E-05           | 1.9              | 2.2E-06                   | 1.9                      | increased                        |
| 236203_at   | HLA-DQA1    | 8.2E-04           | 1.6              | 3.3E-03                   | 1.5                      | decreased                        |

Relative subtype-specific effect indicates a relative increase or decrease in the result comparing the CRC subtype-specific effect to the MSI-specific effect.

Supplemental Table 11a. Summary of differential gene expression analyses conducted for *tumour* samples showing the number of transcript clusters differentially expressed for each comparison made.

| Model specified     | Number of samples/category | FDR $\leq$ 0.05, FC $\geq$ 2 |
|---------------------|----------------------------|------------------------------|
| EF+ vs. EF-         | 7 vs. 10                   | 128                          |
| FB-H vs. FB-L/N     | 7 vs. 12                   | 3                            |
| afaC-H vs. afaC-L/N | 5 vs. 14                   | 0                            |
| afaC+ vs. afaC-     | 13 vs. 8                   | 0                            |
| CIB+ vs. CIB-       | 6 vs. 13                   | 0                            |
| ETBF-H vs. ETBF L/N | 3 vs. 16                   | 0                            |
| ETBF+ vs. ETBF-     | 10 vs. 9                   | 0                            |
| EPEC+ vs. EPEC-     | 3 vs. 16                   | 0                            |

H: high-level infection; L: low-level infection; N: no infection; FB: Fusobacterium; EF: *E. faecalis*

Supplemental Table 11b. Genes differentially expressed in *E. faecalis*+ CRCs. The top 50 (of 128) transcriptclusters (sorted by FDR) are shown.

| Gene ID | Gene symbol | Gene Name                                                                        | P value | FDR     | FC   |
|---------|-------------|----------------------------------------------------------------------------------|---------|---------|------|
| 8166906 | GPR34       | G protein-coupled receptor 34                                                    | 2.6E-07 | 3.9E-03 | 2.4  |
| 8126784 | PLA2G7      | phospholipase A2, group VII (platelet-activating factor acetylhydrolase, plasma) | 4.3E-07 | 3.9E-03 | 2.7  |
| 8138289 | ETV1        | ets variant 1                                                                    | 5.3E-07 | 3.9E-03 | 2.3  |
| 7965410 | DCN         | decorin                                                                          | 2.5E-06 | 8.6E-03 | 3.9  |
| 8100541 | IGFBP7      | insulin-like growth factor binding protein 7                                     | 2.6E-06 | 8.6E-03 | 2.9  |
| 8101126 | CXCL10      | chemokine (C-X-C motif) ligand 10                                                | 2.6E-06 | 8.6E-03 | 5.8  |
| 8102792 | PCDH18      | protocadherin 18                                                                 | 3.1E-06 | 8.6E-03 | 3.7  |
| 7957737 | TMPO        | thymopoietin                                                                     | 3.1E-06 | 8.6E-03 | 2.1  |
| 7965403 | LUM         | lumican                                                                          | 4.1E-06 | 9.4E-03 | 6.1  |
| 8076292 | DNAJB7      | DnaJ (Hsp40) homolog, subfamily B, member 7                                      | 4.9E-06 | 9.4E-03 | -1.8 |
| 8125556 | HLA-DPA1    | major histocompatibility complex, class II, DP alpha 1                           | 5.0E-06 | 9.4E-03 | 3.6  |
| 8017210 | AP1S2       | adaptor-related protein complex 1, sigma 2 subunit                               | 5.2E-06 | 9.4E-03 | 2.2  |
| 7898988 | CLIC4       | chloride intracellular channel 4                                                 | 6.3E-06 | 1.0E-02 | 2.1  |
| 7919815 | CTSK        | cathepsin K                                                                      | 6.7E-06 | 1.0E-02 | 3.5  |
| 8178891 | HLA-DPA1    | major histocompatibility complex, class II, DP alpha 1                           | 7.4E-06 | 1.1E-02 | 3.5  |
| 8001800 | CDH11       | cadherin 11, type 2, OB-cadherin (osteoblast)                                    | 7.9E-06 | 1.1E-02 | 3.1  |
| 8094625 | KLHL5       | kelch-like family member 5                                                       | 9.3E-06 | 1.1E-02 | 2.6  |
| 8160238 | PSIP1       | PC4 and SFRS1 interacting protein 1                                              | 9.4E-06 | 1.1E-02 | 1.7  |
| 8157890 | PBX3        | pre-B-cell leukemia homeobox 3                                                   | 1.0E-05 | 1.2E-02 | 1.9  |
| 7926609 | BMI1        | BMI1 polycomb ring finger oncogene                                               | 1.1E-05 | 1.2E-02 | 2.0  |
| 8145470 | DPYSL2      | dihydropyrimidinase-like 2                                                       | 1.2E-05 | 1.2E-02 | 2.1  |
| 8105229 | PELO        | pelota homolog (Drosophila)                                                      | 1.4E-05 | 1.4E-02 | 2.8  |
| 8180100 | HLA-DPA1    | major histocompatibility complex, class II, DP alpha 1                           | 1.5E-05 | 1.4E-02 | 2.8  |
| 8140840 | STEAP4      | STEAP family member 4                                                            | 1.6E-05 | 1.4E-02 | 2.4  |
| 8127563 | COL12A1     | collagen, type XII, alpha 1                                                      | 1.9E-05 | 1.6E-02 | 4.1  |
| 8128007 | GJB7        | gap junction protein, beta 7, 25kDa                                              | 2.0E-05 | 1.7E-02 | -1.6 |
| 8091032 | FOXL2       | forkhead box L2                                                                  | 2.3E-05 | 1.8E-02 | -1.7 |
| 8046895 | FAM171B     | family with sequence similarity 171, member B                                    | 2.5E-05 | 1.9E-02 | 2.9  |
| 8174322 | MORC4       | MORC family CW-type zinc finger 4                                                | 2.7E-05 | 2.0E-02 | 2.3  |
| 7981377 | ANKRD9      | ankyrin repeat domain 9                                                          | 2.8E-05 | 2.0E-02 | -1.5 |
| 7957260 | GLIPR1      | GLI pathogenesis-related 1                                                       | 2.8E-05 | 2.0E-02 | 2.8  |
| 8036324 | ZNF260      | zinc finger protein 260                                                          | 3.1E-05 | 2.0E-02 | 2.3  |
| 8053882 | DUSP2       | dual specificity phosphatase 2                                                   | 3.1E-05 | 2.0E-02 | -1.6 |

|         |         |                                                                            |         |         |      |
|---------|---------|----------------------------------------------------------------------------|---------|---------|------|
| 8121319 | SOBP    | sine oculis binding protein homolog (Drosophila)                           | 3.1E-05 | 2.0E-02 | 2.1  |
| 8173732 | TAF9B   | TAF9B RNA polymerase II, TATA box binding protein (TBP)-associated factor, | 3.2E-05 | 2.0E-02 | 2.1  |
| 8176263 | TAF9B   | TAF9B RNA polymerase II, TATA box binding protein (TBP)-associated factor, | 3.2E-05 | 2.0E-02 | 2.1  |
| 8143040 | SLC35B4 | solute carrier family 35, member B4                                        | 3.8E-05 | 2.1E-02 | 1.7  |
| 8143054 | AKR1B1  | aldo-keto reductase family 1, member B1 (aldose reductase)                 | 3.9E-05 | 2.1E-02 | 2.1  |
| 8157605 | STOM    | stomatin                                                                   | 3.9E-05 | 2.1E-02 | 1.5  |
| 7936322 | GPAM    | glycerol-3-phosphate acyltransferase, mitochondrial                        | 3.9E-05 | 2.1E-02 | 1.6  |
| 7959761 | FAM101A | family with sequence similarity 101, member A                              | 4.0E-05 | 2.2E-02 | -1.6 |
| 8042439 | ANTXR1  | anthrax toxin receptor 1                                                   | 4.4E-05 | 2.3E-02 | 3.3  |
| 7930833 | KCNK18  | potassium channel, subfamily K, member 18                                  | 4.6E-05 | 2.3E-02 | -1.6 |
| 8089714 | LSAMP   | limbic system-associated membrane protein                                  | 4.7E-05 | 2.3E-02 | 2.1  |
| 7958913 | OAS2    | 2'-5'-oligoadenylate synthetase 2, 69/71kDa                                | 5.0E-05 | 2.3E-02 | 2.3  |
| 7912852 | EIF1AX  | eukaryotic translation initiation factor 1A, X-linked                      | 5.0E-05 | 2.3E-02 | 1.7  |
| 8115234 | ANXA6   | annexin A6                                                                 | 5.1E-05 | 2.3E-02 | 1.7  |
| 8169473 | PLS3    | plastin 3                                                                  | 5.1E-05 | 2.3E-02 | 3.1  |
| 8138805 | CPVL    | carboxypeptidase, vitellogenic-like                                        | 5.6E-05 | 2.4E-02 | 2.0  |
| 8135734 | CPED1   | cadherin-like and PC-esterase domain containing 1                          | 5.6E-05 | 2.4E-02 | 2.4  |

Supplemental Table 11c: Ingenuity Canonical Pathways significantly associated with *E. faecalis* colonisation in CRCs ( $p \leq 0.05$ ). Boldface entries were also significant in the comparison between B vs. A group B CRCs.

| Ingenuity Canonical Pathways                                                 | $-\log(p\text{-value})$ | Downregulated     | Upregulated         |
|------------------------------------------------------------------------------|-------------------------|-------------------|---------------------|
| Antigen Presentation Pathway                                                 | 2.88                    | 0/33 (0%)         | 15/33 (45%)         |
| Hepatic Fibrosis / Hepatic Stellate Cell Activation                          | 2.48                    | 22/191 (12%)      | 44/191 (23%)        |
| Human Embryonic Stem Cell Pluripotency                                       | 2.27                    | 23/129 (18%)      | 29/129 (22%)        |
| Leukocyte Extravasation Signaling                                            | 2.06                    | 15/190 (8%)       | 48/190 (25%)        |
| Agranulocyte Adhesion and Diapedesis                                         | 1.98                    | 17/169 (10%)      | 38/169 (22%)        |
| Allograft Rejection Signaling                                                | 1.91                    | 0/36 (0%)         | 11/36 (31%)         |
| T Helper Cell Differentiation                                                | 1.71                    | 4/62 (6%)         | 13/62 (21%)         |
| <b>Aryl Hydrocarbon Receptor Signaling</b>                                   | <b>1.68</b>             | <b>7/135 (5%)</b> | <b>41/135 (30%)</b> |
| Chondroitin Sulfate Biosynthesis (Late Stages)                               | 1.65                    | 6/43 (14%)        | 5/43 (12%)          |
| L-dopachrome Biosynthesis                                                    | 1.60                    | 1/1 (100%)        | 0/1 (0%)            |
| Glucocorticoid Receptor Signaling                                            | 1.58                    | 18/252 (7%)       | 67/252 (27%)        |
| <b>Antiproliferative Role of TOB in T Cell Signaling</b>                     | <b>1.57</b>             | <b>0/26 (0%)</b>  | <b>14/26 (54%)</b>  |
| Role of Pattern Recognition Receptors in Recognition of Bacteria and Viruses | 1.56                    | 11/116 (9%)       | 28/116 (24%)        |
| OX40 Signaling Pathway                                                       | 1.55                    | 0/46 (0%)         | 17/46 (37%)         |
| Growth Hormone Signaling                                                     | 1.53                    | 6/69 (9%)         | 15/69 (22%)         |
| Colorectal Cancer Metastasis Signaling                                       | 1.53                    | 27/228 (12%)      | 50/228 (22%)        |
| Cdc42 Signaling                                                              | 1.48                    | 11/121 (9%)       | 32/121 (26%)        |
| Chondroitin Sulfate Biosynthesis                                             | 1.41                    | 8/51 (16%)        | 6/51 (12%)          |
| Axonal Guidance Signaling                                                    | 1.39                    | 57/424 (13%)      | 81/424 (19%)        |
| Calcium-induced T Lymphocyte Apoptosis                                       | 1.36                    | 3/53 (6%)         | 18/53 (34%)         |
| Dermatan Sulfate Biosynthesis                                                | 1.36                    | 8/53 (15%)        | 7/53 (13%)          |
| Role of JAK2 in Hormone-like Cytokine Signaling                              | 1.34                    | 2/32 (6%)         | 5/32 (16%)          |
| Granulocyte Adhesion and Diapedesis                                          | 1.32                    | 12/159 (8%)       | 35/159 (22%)        |
| Hypusine Biosynthesis                                                        | 1.30                    | 1/2 (50%)         | 0/2 (0%)            |
| Cardiolipin Biosynthesis II                                                  | 1.30                    | 1/2 (50%)         | 0/2 (0%)            |
