# Supplementary material for: Bacterially-Associated Transcriptional Remodelling in a Distinct Genomic Subtype of Colorectal Cancer Provides a Plausible Molecular Basis for Disease Development
Source: PubMed Central journal article supplement (PMC5112903; doi:10.1371/journal.pone.0166282), 2016-11-15
Supplement: pone.0166282.s003.pdf [file pone.0166282.s003.pdf]

# Supplemental Figure 1

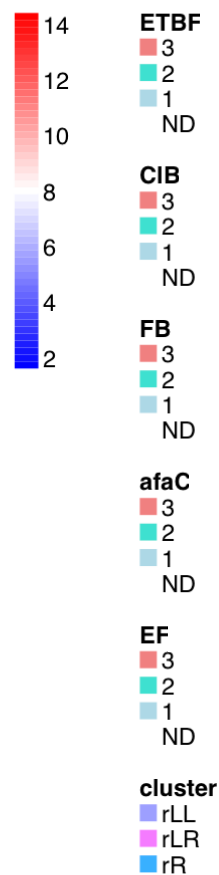

10T20T 4T 3T 60T56T15T14T33T11T63T18T34T13T 8T 41T23T37T44T
