# Supplementary material for: Bacterially-Associated Transcriptional Remodelling in a Distinct Genomic Subtype of Colorectal Cancer Provides a Plausible Molecular Basis for Disease Development
Source: PubMed Central journal article supplement (PMC5112903; doi:10.1371/journal.pone.0166282), 2016-11-15
Supplement: pone.0166282.s004.pdf [file pone.0166282.s004.pdf]

# Supplemental Figure 2

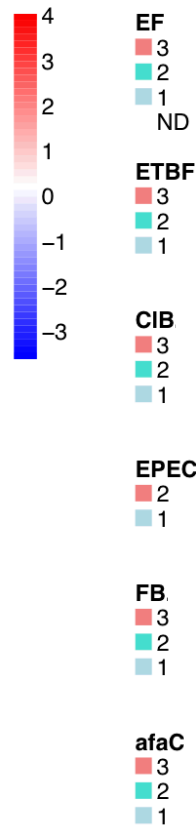

33T 56T 15T 60T 14T 10T 4T 3T 20T 18T 63T 11T 23T 37T 44T 41T 8T 13T 34T
