# Supplementary material for: Bacterially-Associated Transcriptional Remodelling in a Distinct Genomic Subtype of Colorectal Cancer Provides a Plausible Molecular Basis for Disease Development
Source: PubMed Central journal article supplement (PMC5112903; doi:10.1371/journal.pone.0166282), 2016-11-15

# Supplemental

## Figure 3

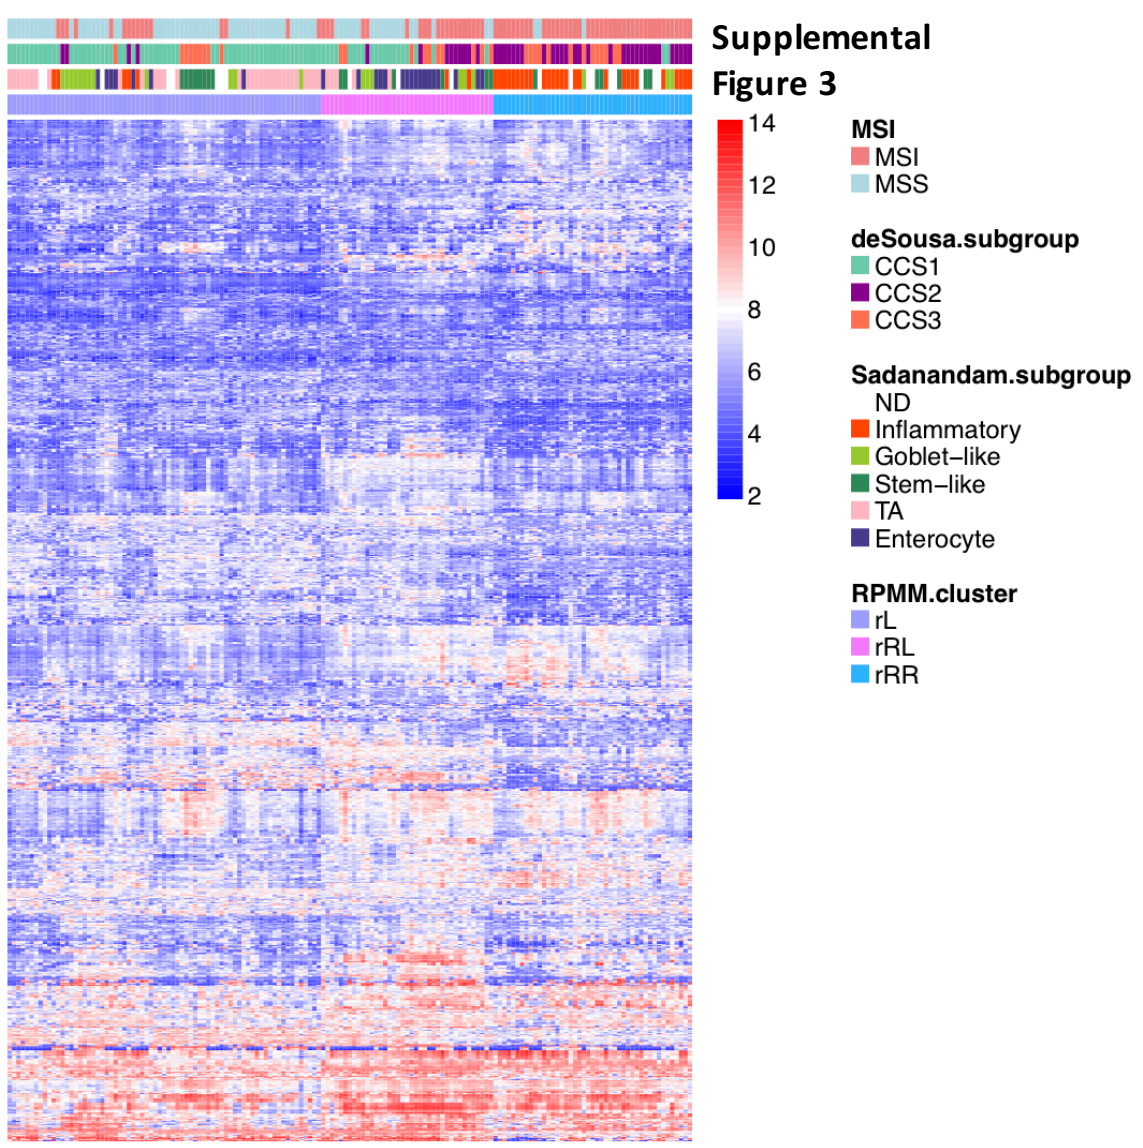

Supplement: pone.0166282.s005.pdf [file pone.0166282.s005.pdf]
