# Supplementary material for: Bacterially-Associated Transcriptional Remodelling in a Distinct Genomic Subtype of Colorectal Cancer Provides a Plausible Molecular Basis for Disease Development
Source: PubMed Central journal article supplement (PMC5112903; doi:10.1371/journal.pone.0166282), 2016-11-15
Supplement: pone.0166282.s007.pdf [file pone.0166282.s007.pdf]

# Supplemental Figure 5

**MSI**  
■ MSI-H  
■ MSI-L  
■ MSS  
ND

**Location**  
■ Proximal  
■ Distal

**cluster**  
■ rL  
■ rRL  
■ rRR

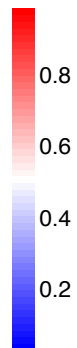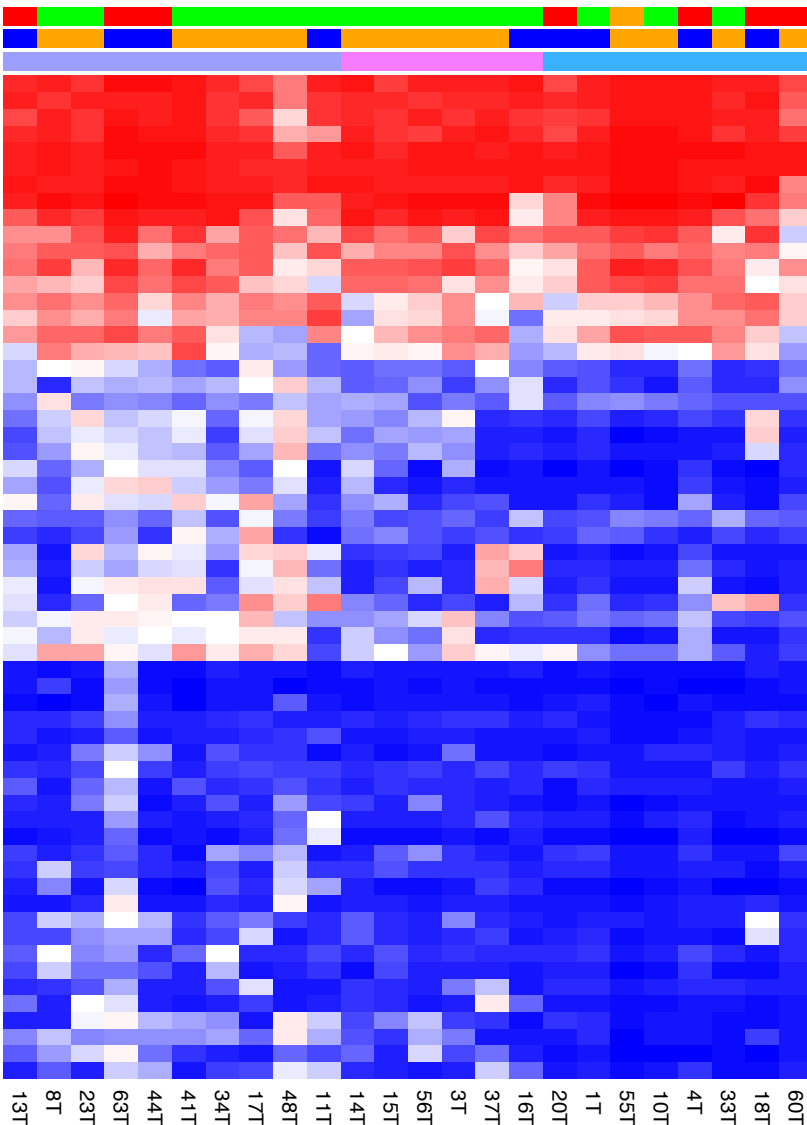

cg13200664  
cg16314733  
cg20023155  
cg15397740  
cg18306625  
cg07577957  
cg13525013  
cg04353164  
cg00922825  
cg06569542  
cg09491962  
cg11106262  
cg26164234  
cg17982102  
cg18456459  
cg05265607  
cg18390345  
cg19273746  
cg18868483  
cg20461912  
cg05182249  
cg00881552  
cg13509849  
cg13196826  
cg07143898  
cg23685759  
cg27192088  
cg13261825  
cg16556906  
cg22180201  
cg12306213  
cg13485230  
cg08980711  
cg02741216  
cg07135614  
cg21581531  
cg23429696  
cg00446211  
cg26201815  
cg14595252  
cg22967284  
cg24441185  
cg20832137  
cg13462028  
cg14161579  
cg03982087  
cg101088070  
cg25645687  
cg16234029  
cg22669058  
cg12212555  
cg09448946  
cg01172965  
cg22819502  
cg18499667  
cg18403396  
cg00364611  
cg05330297  
cg10188732  
cg04274487

60T  
18T  
33T  
4T  
10T  
55T  
1T  
20T  
16T  
37T  
3T  
56T  
15T  
14T  
11T  
48T  
17T  
34T  
41T  
44T  
63T  
23T  
8T  
13T
